# Supplementary material for: Effect of the Nature of the Electrolyte on the Behavior of Supercapacitors Based on Transparent ZnMn2O4 Thin Films
Source: MDPI journal article supplement (doi:10.3390/nano13233017), 2023-11-24
Supplement: s1 [file nanomaterials-2714841-supplementary.pdf › nanomaterials-2714841-supplementary.pdf]

## Supplementary Information

### Effect of the nature of the electrolyte on the behaviour of supercapacitors based on transparent $\text{ZnMn}_2\text{O}_4$ thin films

Juan José Peinado-Pérez<sup>a</sup>, María Cruz Lopez-Escalante<sup>b</sup>, Francisco Martín<sup>b\*</sup>

<sup>a</sup>Department of Applied Physics I. Faculty of Sciences, University of Málaga, Campus de Teatinos, E-29071. Málaga (Spain).

<sup>b</sup>Department of Chemical Engineering, Faculty of Sciences, University of Málaga, Campus de Teatinos, E-29071 Málaga, Spain. (\* corresponding author [marjim@uma.es](mailto:marjim@uma.es))

#### 1. Optical properties

| Sample                                  | Visible transmittance<br>(from 380 to 770 nm) D65 | Solar transmittance<br>(from 295 to 2415 nm) | Colorimetric coordinates<br>CIE 1931 | Colorimetric coordinates<br>CIELAB (1976, 2°, D65) |
|-----------------------------------------|---------------------------------------------------|----------------------------------------------|--------------------------------------|----------------------------------------------------|
| ITO                                     | 0.82                                              | 0.79                                         | Y=81.81, x=0.31, y=0.32              | L* = 92.49, a* =1.03, b* =-3.01                    |
| ITO/ $\text{ZnMn}_2\text{O}_4$ (2 min)  | 0.72                                              | 0.71                                         | Y=71.29, x=0.33, y=0.35              | L* = 87.83, a* =-1.16, b* =8.73                    |
| ITO/ $\text{ZnMn}_2\text{O}_4$ (5 min)  | 0.57                                              | 0.63                                         | Y=56.6, x=0.35, y=0.36               | L* = 79.95, a* =0.71, b* =16.62                    |
| ITO/ $\text{ZnMn}_2\text{O}_4$ (15 min) | 0.30                                              | 0.48                                         | Y=30.49, x=0.4, y=0.4                | L* = 62.07, a* =5.72, b* = 30.81                   |

Table SI 1: Visible and solar transmittance values, and colorimetric coordinates

#### 2. Three-electrode electrochemical cell characterization of $\text{ZnMn}_2\text{O}_4$ electrodes Figure SI 1:

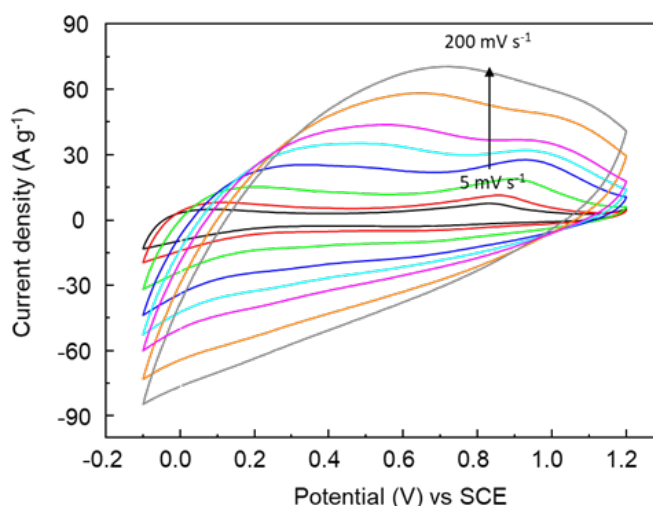

Three-electrode cyclic voltammogram curves at different scan rates: 5, 10, 25, 50, 75, 100, 150 and 200  $\text{mV s}^{-1}$ .

| Deposition method            | Electrode                                                        | Electrolyte                        | Specific capacitance (F g <sup>-1</sup> )                  | Capacitance retention (%) | Energy density (W h kg <sup>-1</sup> ) | Power density (W kg <sup>-1</sup> ) | Reference  |
|------------------------------|------------------------------------------------------------------|------------------------------------|------------------------------------------------------------|---------------------------|----------------------------------------|-------------------------------------|------------|
| Pneumatique Spray deposition | ZnMn <sub>2</sub> O <sub>4</sub>                                 | 1M Na <sub>2</sub> SO <sub>4</sub> | 752 (0.5A g <sup>-1</sup> )<br>693 (5 mV s <sup>-1</sup> ) | 70% after 3000 cycles     | 1-8                                    | 300-1000                            | This study |
|                              | ZnMn <sub>2</sub> O <sub>4</sub>                                 | 2M KOH                             | 155 (2 mV s <sup>-1</sup> )                                | *                         | *                                      | *                                   | [45]       |
| Hydrothermal method          | ZnMn <sub>2</sub> O <sub>4</sub>                                 | 1M KCl                             | 675 (5 mV s <sup>-1</sup> )                                | 61.7 % after 1000 Cycles  | *                                      | *                                   | [74]       |
|                              | ZnMn <sub>2</sub> O <sub>4</sub>                                 | 1M Na <sub>2</sub> SO <sub>4</sub> | 87 (1 mV s <sup>-1</sup> )                                 | 60 % after 1000 Cycles    | *                                      | *                                   | [75]       |
|                              | ZnMn <sub>2</sub> O <sub>4</sub>                                 | 2 M KOH                            | 54 (20 mV s <sup>-1</sup> )                                | *                         | *                                      | *                                   | [76]       |
|                              | ZnMn <sub>2</sub> O <sub>4</sub>                                 | 2 M KOH                            | 776 (5 mV s <sup>-1</sup> )                                | 91 % after 5000 cycles    | *                                      | *                                   | [77]       |
| Combustion method            | Carbon-ZnMn <sub>2</sub> O <sub>4</sub>                          | Na <sub>2</sub> SO <sub>4</sub>    | 150 (2 mV s <sup>-1</sup> )                                | 60 % after 10000 cycles   | *                                      | *                                   | [2]        |
|                              | ZnMn <sub>2</sub> O <sub>4</sub>                                 | 2 M KOH                            | 160 (3 mV s <sup>-1</sup> )                                | 100% after 500 cycles     | 18                                     | 185                                 | [70]       |
| Ultrasonication              | ZnMn <sub>2</sub> O <sub>4</sub> -Mn <sub>2</sub> O <sub>3</sub> | 2 M KOH                            | 380 (0.5 A g <sup>-1</sup> )                               | 92 % after 2000 cycles    | *                                      | *                                   | [78]       |
| * Non data available         |                                                                  |                                    |                                                            |                           |                                        |                                     |            |

Table SI 2: Values of specific capacitance obtained by different authors

## References

2. Abdollahifar, M.; Huang, S.S.;Y.H. Lin, Y.H.; Li, Y.C.; Shih, B.Y.; Sheu, H.S.; Liao, Y.F.; Wu, N.I. High-performance carbon-coated ZnMn<sub>2</sub>O<sub>4</sub> nanocrystallite supercapacitors with tailored microstructures enabled by a novel solution combustion method, J. Power Sources. 2018, 378, 90-97. <https://doi.org/10.1016/j.jpowsour.2017.12.022>.
45. Guo, N.; Wei, X.; Deng, X.L.; Xu, X.J. Synthesis and Property of Spinel Porous ZnMn<sub>2</sub>O<sub>4</sub> microspheres, Appl. Surf. Sci. 2015, 356, 1127-1134. <https://doi.org/10.1016/j.apsusc.2015.08.185>
70. Sahoo, A.; Sharma. Y. Synthesis and characterization of nanostructured ternary zinc manganese oxide as novel supercapacitor material. Mater. Chem. Phys, 2015, 149–150, 721-727. <https://doi.org/10.1016/j.matchemphys.2014.11.032>.
74. Senthilkumar, N.; Venkatachalam, V.; Kandiban, M.; Vigneshwaran, P.; Jayavel, R.; Potheher, I.V. Studies on Electrochemical Properties of Heterolite (ZnMn<sub>2</sub>O<sub>4</sub>) Nanostructure for Supercapacitor Application. Physica E: Low-Dimens. Syst. Nanostruct., 2019, 106, 121-126. <https://doi.org/10.1016/j.physe.2018.10.027>.
75. Aruchamy, K.; Nagaraj, R.; Manohara , H.M.; Nidhi , M.R.; Mondal , D.; Ghosh , D.; Nataraj. K. One-step green route synthesis of spinel ZnMn<sub>2</sub>O<sub>4</sub> nanoparticles decorated on MWCNTs as a novel electrode material for supercapacitor. Mater. Sci. Eng. B, 2020, 252. <https://doi.org/10.1016/j.mseb.2019.114481>.
76. Wei, X.Q.; Wang, Y.L.; Guo, N.; Deng, X.; Xu. X.J. Effect of growing temperature on structure and electrochemical performance of ZnMn<sub>2</sub>O<sub>4</sub> nanospheres. Ionics, 2017, 23, 2443–2448. <https://doi.org/10.1007/s11581-017-2082-1>
77. Mani, M.P; Venkatachalam, V.; Thamizharasan, K.; Jothibas. M.Evaluation of Cubic-Like Advanced ZnMn<sub>2</sub>O<sub>4</sub> Electrode for High-Performance Supercapacitor Applications. J. Electron. Mater., 2021, 50, 4381–4387. <https://doi.org/10.1007/s11664-021-08962-0>

78.Sannasi, V.; Subbian, K. A facile synthesis of  $\text{ZnMn}_2\text{O}_4/\text{Mn}_2\text{O}_3$  composite nanostructures for supercapacitor applications. Ceram. Int., 2021, 47, 12300-12309. <https://doi.org/10.1016/j.ceramint.2021.01.081>

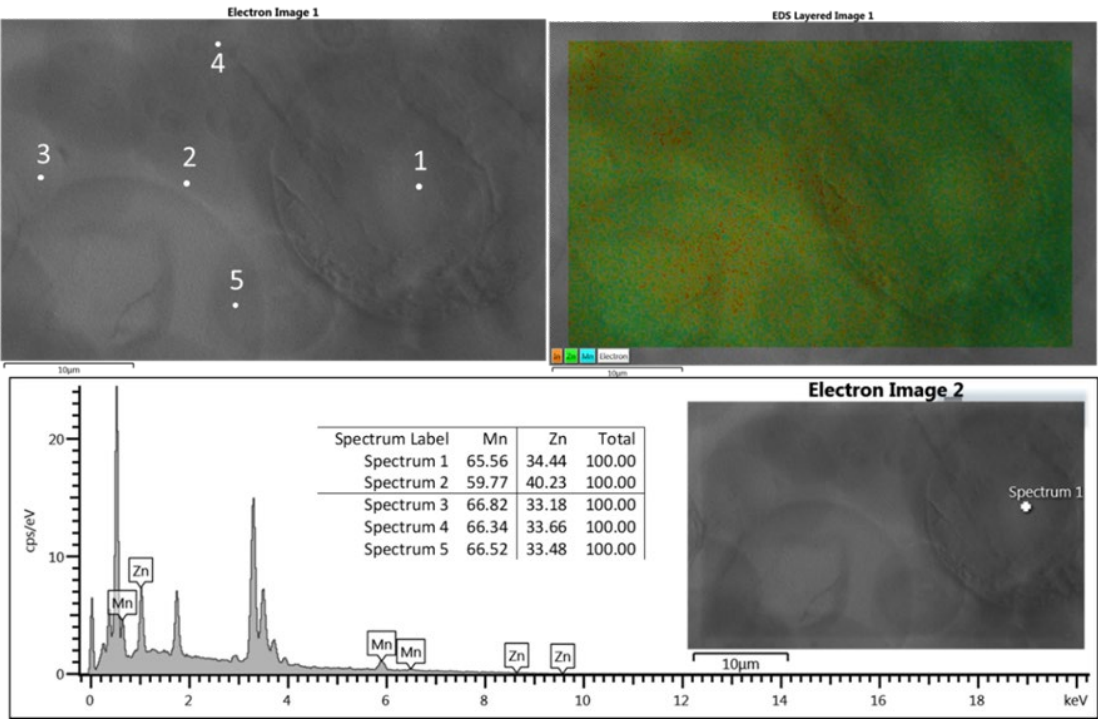

Figure SI 2: Example of EDS spectrum of the  $\text{ZnMn}_2\text{O}_4$  electrode as obtained, and atomic percentages of Mn and Zn.

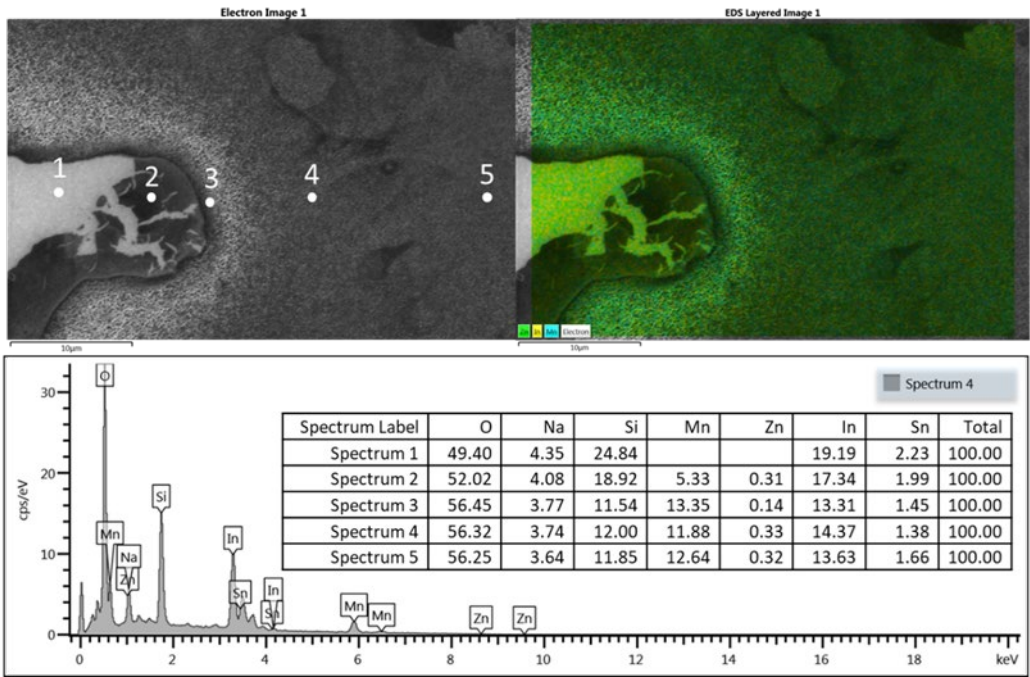

Figure SI 3: Example of EDS spectrum of the  $\text{ZnMn}_2\text{O}_4$  electrode after 3000 CV cycles and local values of the atomic percentage of the different chemical elements.

### 3. SCC, 1 M Na<sub>2</sub>SO<sub>4</sub> electrolyte

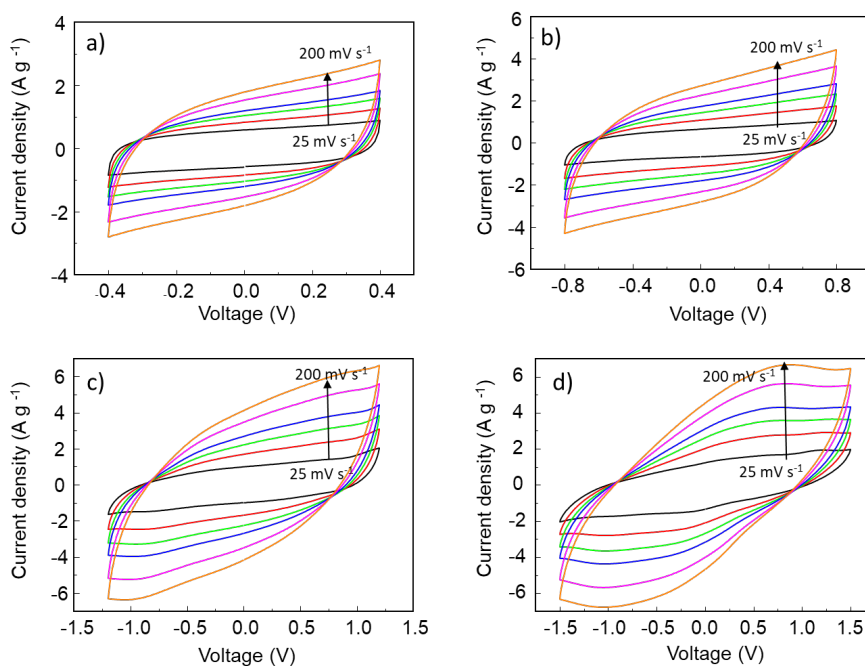

Figure SI 4: Cyclic voltammetry curves of SSC assembled with 1 M Na<sub>2</sub>SO<sub>4</sub>. (a)  $\pm 0.4$  V; (b)  $\pm 0.8$  V; (c)  $\pm 1.2$  V; (d)  $\pm 1.5$  V with different scan rates: 25 mV s<sup>-1</sup>, 50 mV s<sup>-1</sup>, 75 mV s<sup>-1</sup>, 100 mV s<sup>-1</sup>, 150 mV s<sup>-1</sup> and 200 mV s<sup>-1</sup>.

| (a)                                      |                                |                      |           |           |           |
|------------------------------------------|--------------------------------|----------------------|-----------|-----------|-----------|
| Specific capacitance (Fg <sup>-1</sup> ) | Scan rate (mVs <sup>-1</sup> ) | Potential window (V) |           |           |           |
|                                          |                                | $\pm 0.4$            | $\pm 0.8$ | $\pm 1.2$ | $\pm 1.5$ |
| 1M Na <sub>2</sub> SO <sub>4</sub>       | 25                             | 21                   | 23        | 33        | 39        |
|                                          | 50                             | 15                   | 19        | 28        | 30        |
|                                          | 75                             | 12                   | 17        | 24        | 26        |
|                                          | 100                            | 10                   | 15        | 21        | 23        |
|                                          | 150                            | 9                    | 13        | 18        | 20        |
|                                          | 200                            | 8                    | 11        | 16        | 17        |

| (b)                                |                                      |                    |                                           |                                       |                                     |
|------------------------------------|--------------------------------------|--------------------|-------------------------------------------|---------------------------------------|-------------------------------------|
| Electrolyte                        | Current Density (A g <sup>-1</sup> ) | Time discharge (s) | Specific Capacitance (F g <sup>-1</sup> ) | Energy density (Wh kg <sup>-1</sup> ) | Power density (W kg <sup>-1</sup> ) |
| 1M Na <sub>2</sub> SO <sub>4</sub> | 0.5                                  | 40                 | 17                                        | 3.4                                   | 306                                 |
|                                    | 1.0                                  | 8                  | 7                                         | 1.4                                   | 630                                 |
|                                    | 2.0                                  | 1                  | 2                                         | 0.4                                   | 1440                                |

Table SI 3. (a) Specific capacitance, energy and power density calculated from cyclic voltammetry; (b) GCD measurements of the SSC assembled with 1.0 M Na<sub>2</sub>SO<sub>4</sub> electrolyte

#### 4. SCC, PVP-Ionic Liquid electrolyte

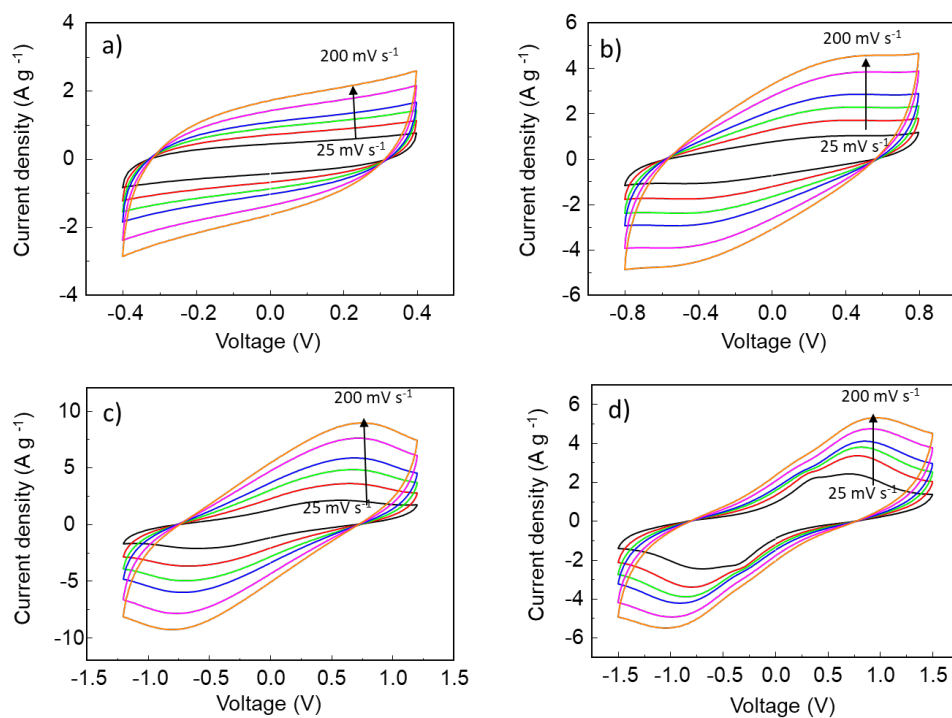

Figure SI 5. Cyclic voltammetry curves of SCC assembled with PVP-Ionic Liquid. (a)  $\pm 0.4$  V; (b)  $\pm 0.8$  V; (c)  $\pm 1.2$  V; (d)  $\pm 1.5$  V with different scan rates:  $25 \text{ mV s}^{-1}$ ,  $50 \text{ mV s}^{-1}$ ,  $75 \text{ mV s}^{-1}$ ,  $100 \text{ mV s}^{-1}$ ,  $150 \text{ mV s}^{-1}$  and  $200 \text{ mV s}^{-1}$ .

| (a)                                       |                                       |                      |                                            |                                        |                                      |
|-------------------------------------------|---------------------------------------|----------------------|--------------------------------------------|----------------------------------------|--------------------------------------|
| Specific capacitance ( $\text{Fg}^{-1}$ ) | Scan rate ( $\text{mVs}^{-1}$ )       | Potential window (V) |                                            |                                        |                                      |
|                                           |                                       | $\pm 0.4$            | $\pm 0.8$                                  | $\pm 1.2$                              | $\pm 1.5$                            |
| PVP-Ionic Liquid                          | 25                                    | 15                   | 23                                         | 40                                     | 37                                   |
|                                           | 50                                    | 11                   | 20                                         | 35                                     | 29                                   |
|                                           | 75                                    | 10                   | 18                                         | 31                                     | 20                                   |
|                                           | 100                                   | 9                    | 16                                         | 28                                     | 16                                   |
|                                           | 150                                   | 8                    | 14                                         | 24                                     | 13                                   |
|                                           | 200                                   | 7                    | 13                                         | 21                                     | 11                                   |
| (b)                                       |                                       |                      |                                            |                                        |                                      |
| Electrolyte                               | Current Density ( $\text{A g}^{-1}$ ) | Time discharge (s)   | Specific Capacitance ( $\text{F g}^{-1}$ ) | Energy density ( $\text{Wh kg}^{-1}$ ) | Power density ( $\text{W kg}^{-1}$ ) |
| PVP-Ionic Liquid                          | 0.5                                   | 35                   | 15                                         | 3.0                                    | 309                                  |
|                                           | 1.0                                   | 6                    | 5                                          | 1.0                                    | 600                                  |
|                                           | 2.0                                   | 2                    | 3                                          | 0.6                                    | 1080                                 |

Table SI 4. (a) Specific capacitance, energy and power density calculated from cyclic voltammetry, (b) GCD measurements, of the SCC assembled with PVP-Ionic Liquid.

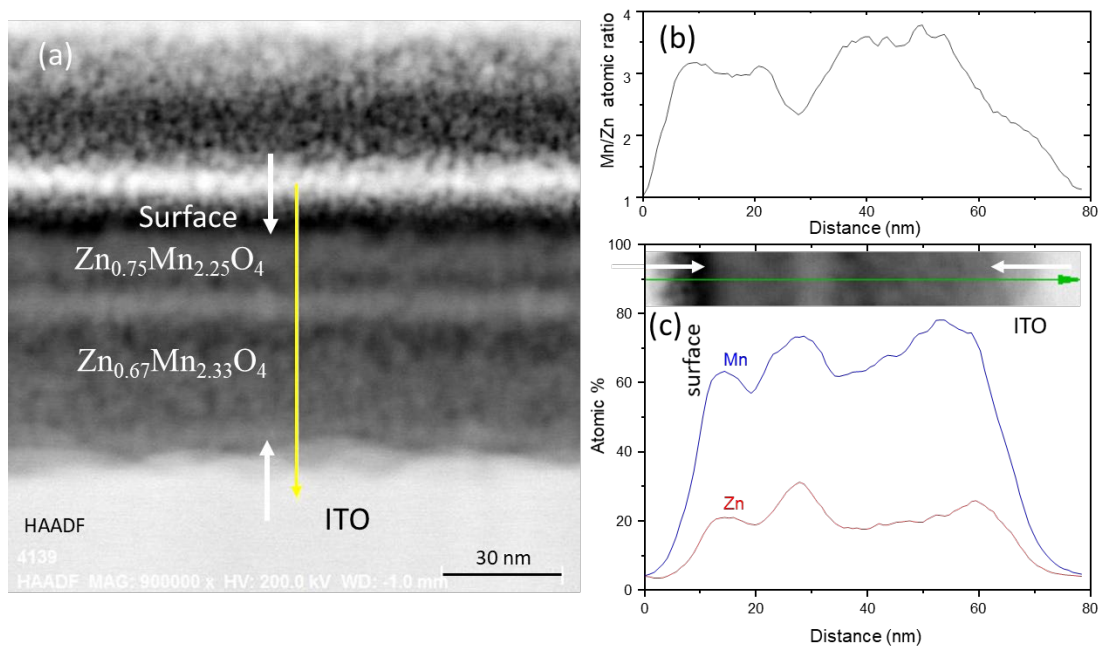

Figure SI 6: (a) HAADF image EDS of the cross-section of the SCC (PVP-Ionic Liquid) electrode after 300 CV cycles; (b) Mn/Zn atomic ratio and (c) atomic percentages of Mn and Zn, along the line marked on the HAADF image.

## 5. SCC, PVP- $\text{LiClO}_4$ electrolyte

Figure SI 7. Cyclic voltammetry curves of SSC assembled with PVP-Ionic Liquid. (a)  $\pm 0.4$  V; (b)  $\pm 0.8$  V; (c)  $\pm 1.2$  V; (d)

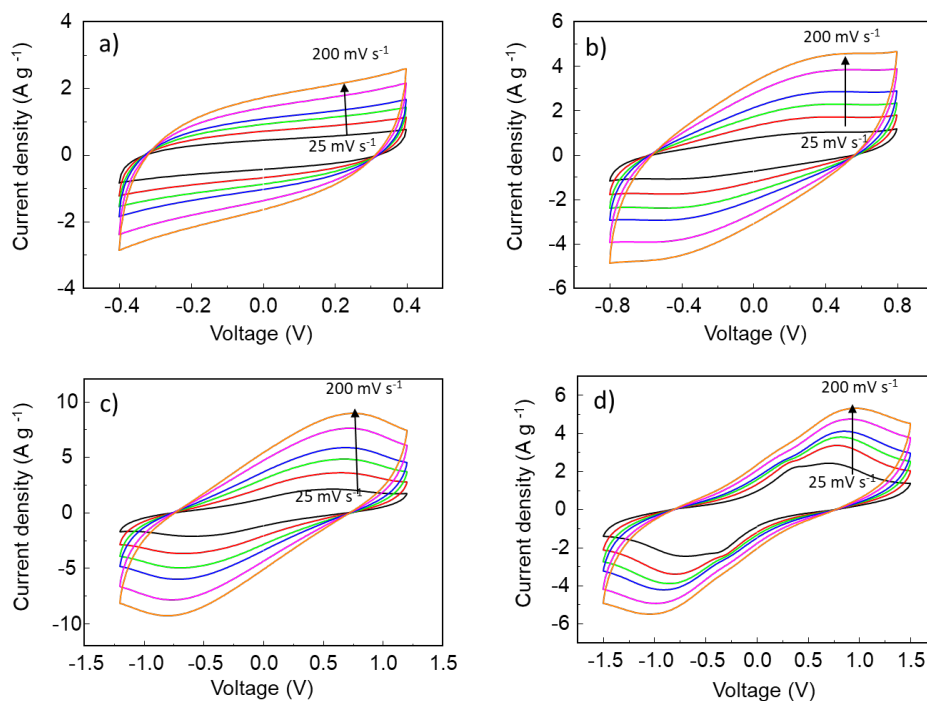

$\pm 1.5$  V with different scan rates: 25  $\text{mV s}^{-1}$ , 50  $\text{mV s}^{-1}$ , 75  $\text{mV s}^{-1}$ , 100  $\text{mV s}^{-1}$ , 150  $\text{mV s}^{-1}$  and 200  $\text{mV s}^{-1}$ .

| (a)                                        |                                 |                      |           |           |           |
|--------------------------------------------|---------------------------------|----------------------|-----------|-----------|-----------|
| Specific capacitance ( $\text{F g}^{-1}$ ) | Scan rate ( $\text{mVs}^{-1}$ ) | Potential window (V) |           |           |           |
|                                            |                                 | $\pm 0.4$            | $\pm 0.8$ | $\pm 1.2$ | $\pm 1.5$ |
| PVP-LiClO <sub>4</sub>                     | 25                              | 13                   | 17        | 22        | 19        |
|                                            | 50                              | 12                   | 16        | 19        | 16        |
|                                            | 75                              | 11                   | 15        | 17        | 14        |
|                                            | 100                             | 10                   | 14        | 15        | 12        |
|                                            | 150                             | 10                   | 14        | 14        | 11        |
|                                            | 200                             | 9                    | 13        | 13        | 10        |

  

| (b)                    |                                       |                    |                                            |                                        |                                      |
|------------------------|---------------------------------------|--------------------|--------------------------------------------|----------------------------------------|--------------------------------------|
| Electrolyte            | Current Density ( $\text{A g}^{-1}$ ) | Time discharge (s) | Specific Capacitance ( $\text{F g}^{-1}$ ) | Energy density ( $\text{Wh kg}^{-1}$ ) | Power density ( $\text{W kg}^{-1}$ ) |
| PVP-LiClO <sub>4</sub> | 0.5                                   | 94                 | 39                                         | 7.8                                    | 299                                  |
|                        | 1.0                                   | 38                 | 31                                         | 6.2                                    | 587                                  |
|                        | 2.0                                   | 13                 | 21                                         | 4.2                                    | 1163                                 |

Table SI 5. (a) Specific capacitance, energy and power density calculated from cyclic voltammetry; (b) galvanostatic charge-discharge measurements of the SSC assembled with PVP-LiClO<sub>4</sub>.

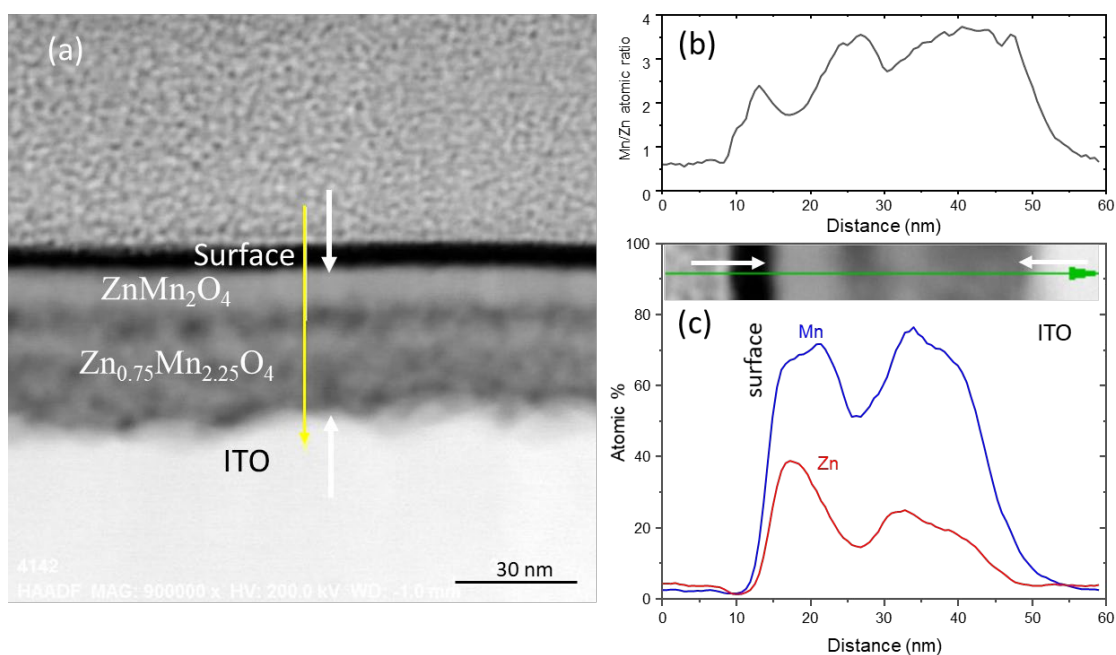

Figure S8: (a) HAADF image EDS of the cross-section of the SCC electrode (PVP-LiClO<sub>4</sub>) after 300 CV cycles; (b) Mn/Zn atomic ratio and (c) atomic percentages of Mn and Zn, along the line marked on the HAADF image



## 6. SEM images of the SSCs electrodes after CV cycling

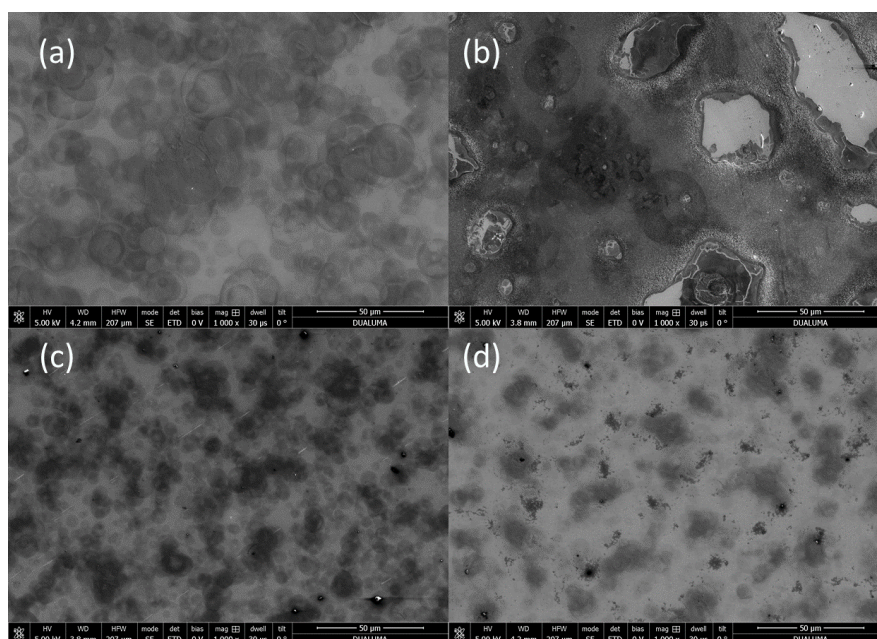

Figure SI 9: (a) SEM images of the surface of the electrode as obtained. SEM images of the surface of the SSC electrode after 300 CV cycles using as electrolyte: (b) 1.0 M  $\text{Na}_2\text{SO}_4$ , (c) PVP-Ionic Liquid, (d) PVP- $\text{LiClO}_4$ .
